# Supplementary material for: Acid-responsive H2-releasing Fe nanoparticles for safe and effective cancer therapy
Source: Royal Society of Chemistry journal article supplement (doi:10.1039/c9tb00338j), 2019-01-01
Supplement: c9tb00338j1.pdf [file c9tb00338j1.pdf]

## Supporting information

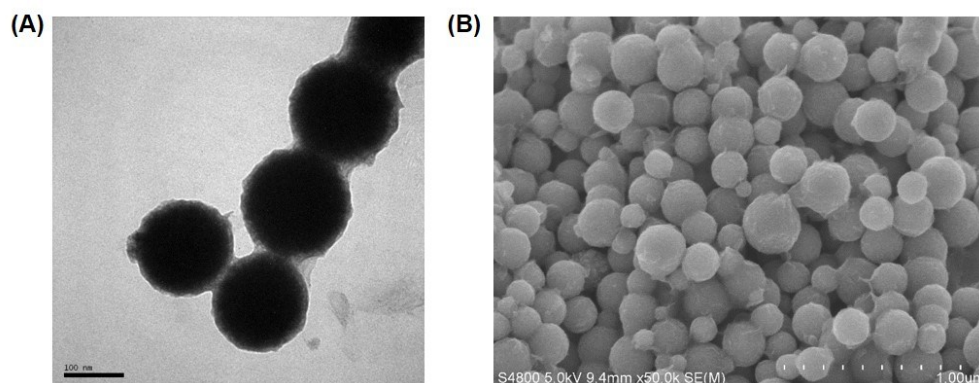

**Figure S1** (A) TEM of Fe@CMC nanoparticles. (B) SEM of Fe@CMC nanoparticles.

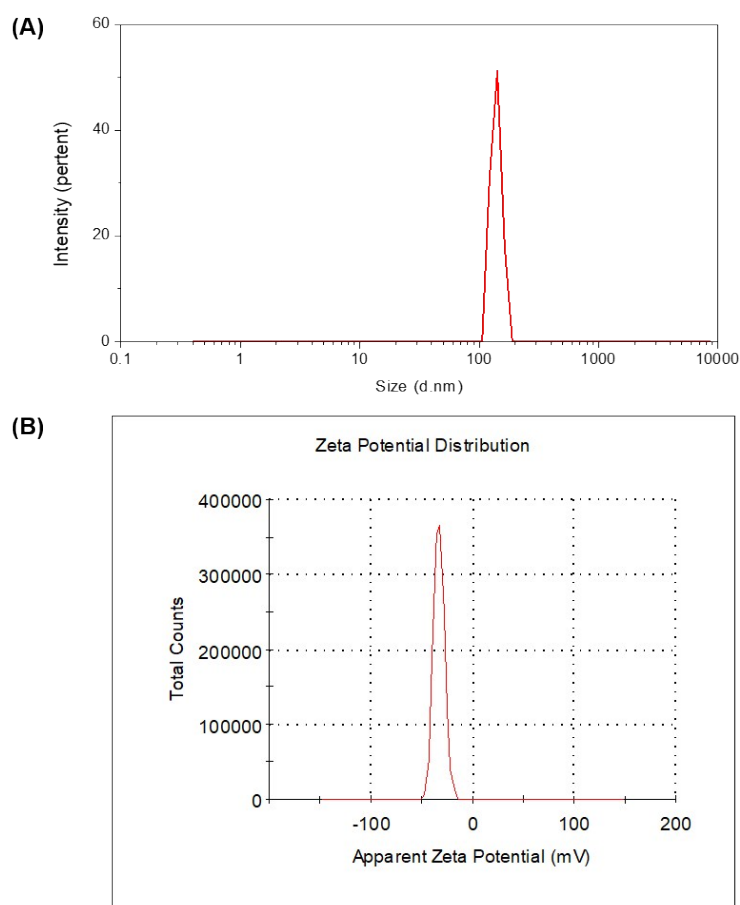

**Figure S2** (A) Size distribution of Fe@CMC nanoparticles. (B) Zeta potential distribution of Fe@CMC nanoparticles.

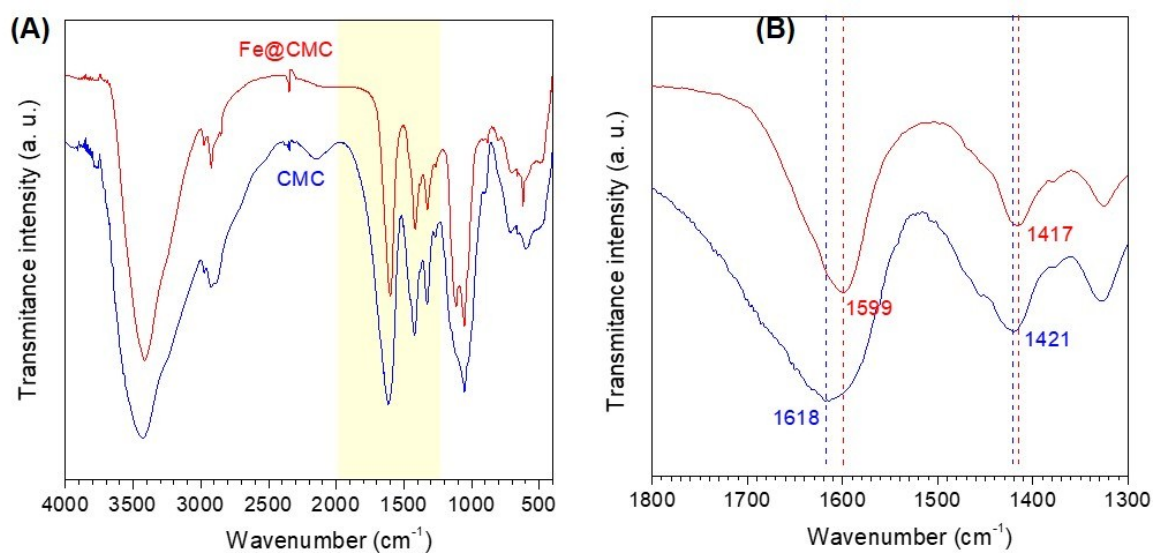

**Figure S3** FTIR spectra of CMC and Fe@CMC materials.

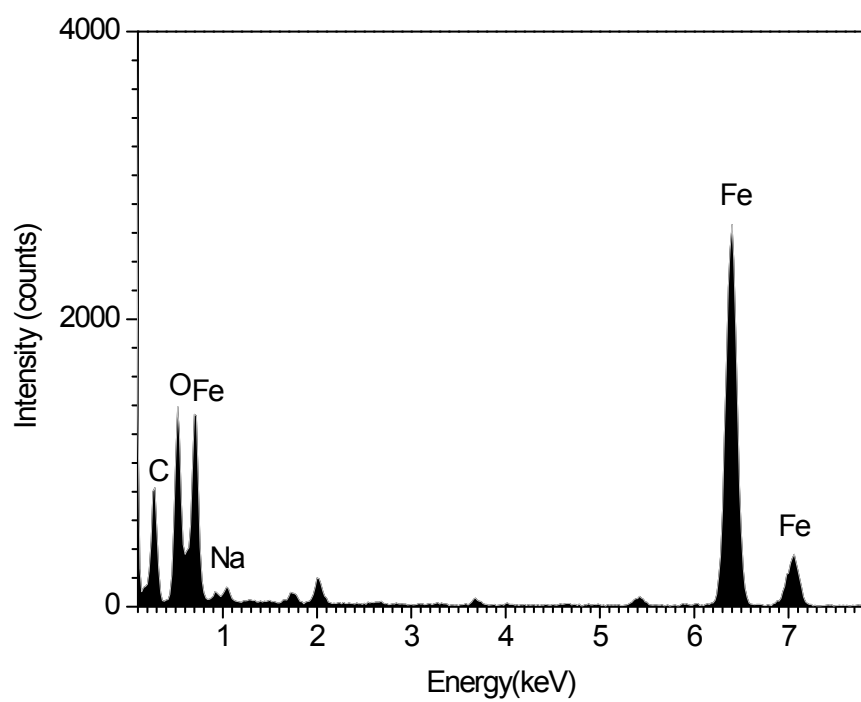

**Figure S4** EDS spectra of Fe@CMC.

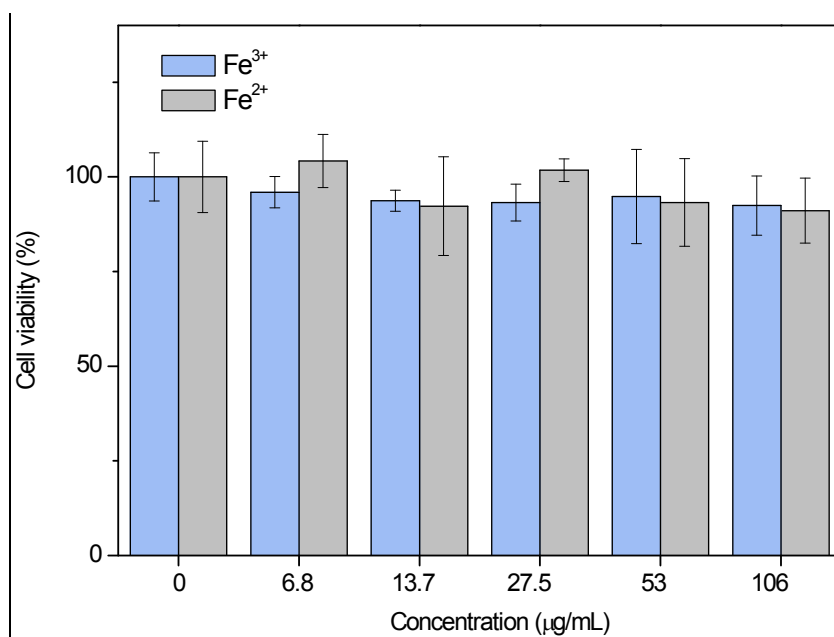

**Figure S5** Cytotoxicity of Fe<sup>3+</sup> and Fe<sup>2+</sup> ions to B16 cells.

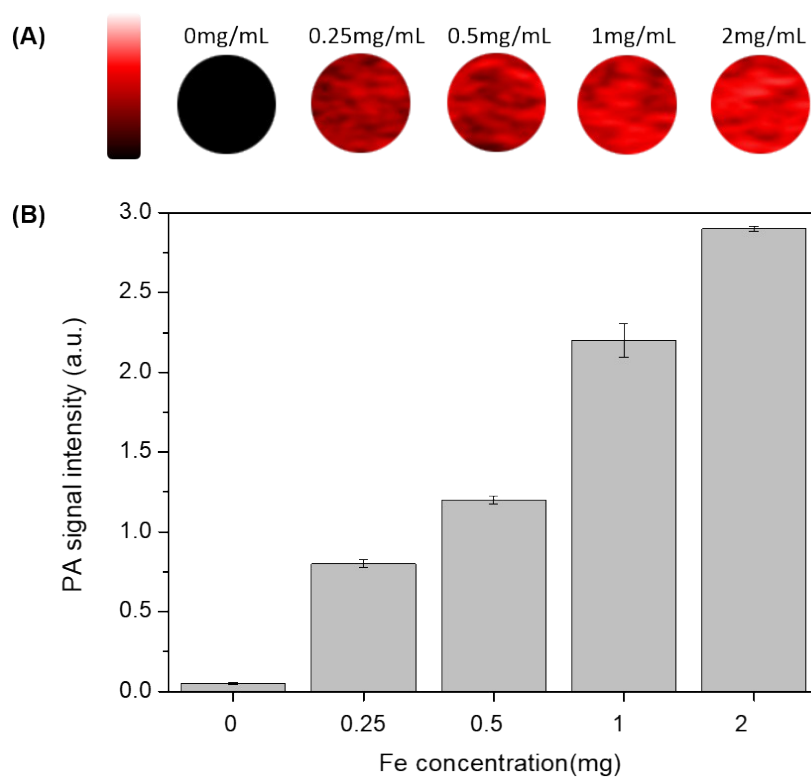

**Figure S6** The dependence of Fe imaging signal of Fe@CMC nanoparticle solution on its concentration. Figure B is the quantitative statistical analysis of Figure A.

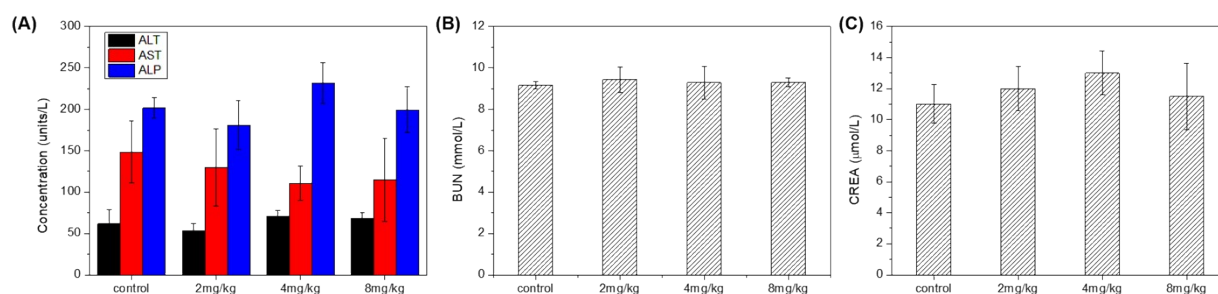

**Figure S7** Blood biochemical analyses including liver functions (A) and kidney functions (B, C). ALP, alkaline phosphatase; ALT, alanine transaminase; AST, aspartate transaminase; CREA, creatinine; BUN, blood urea nitrogen (n = 3). Mean value and error bar are defined as mean and s.d., respectively.

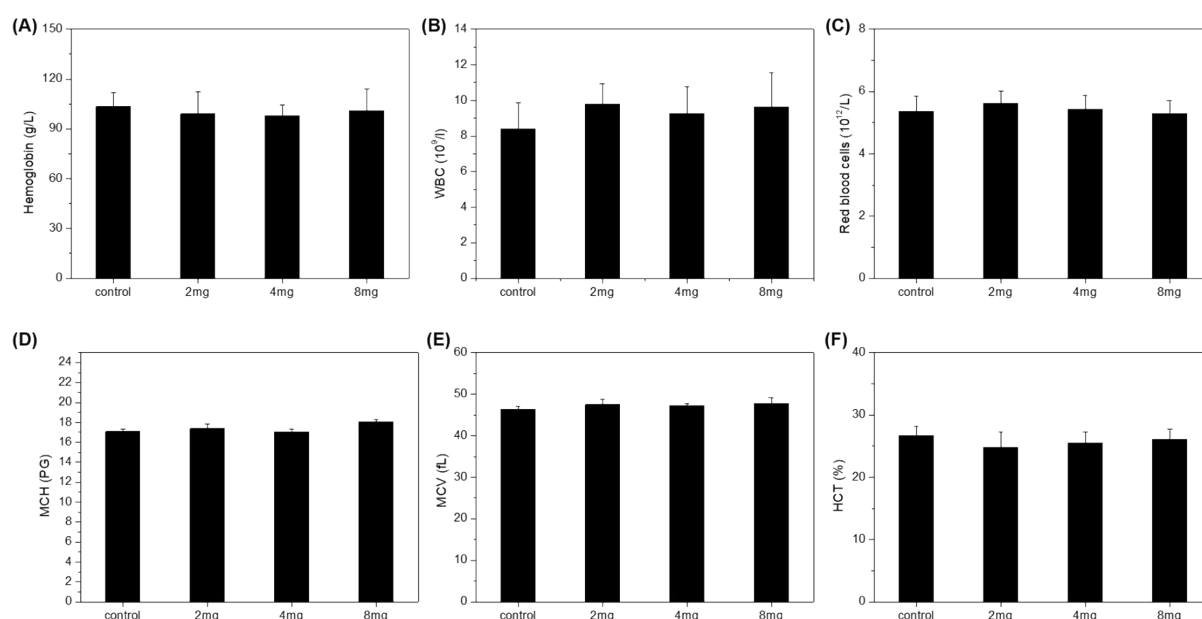

**Figure S8** The evaluation of standard haematology markers including HGB(A), WBC(B), RBC(C), MCH(D), MCV(E), HCT(F). HGB, haemoglobin; WBC, white blood cells; RBC, red blood cells; MCH, mean corpuscular hemoglobin; MCV, means corpuscular volume; HCT, haematocrit width (n = 3). Mean value and error bar are defined as mean and s.d., respectively.

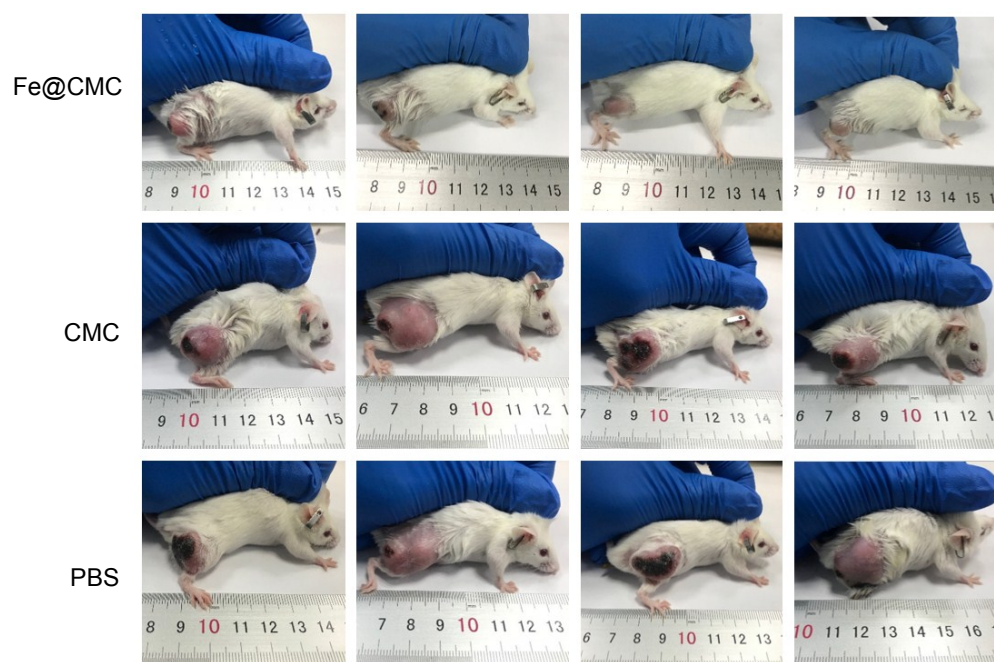

**Figure S9** Digital photos of tumor-bearing mice treated with PBS, CMC, Fe@CMC for 14 days.

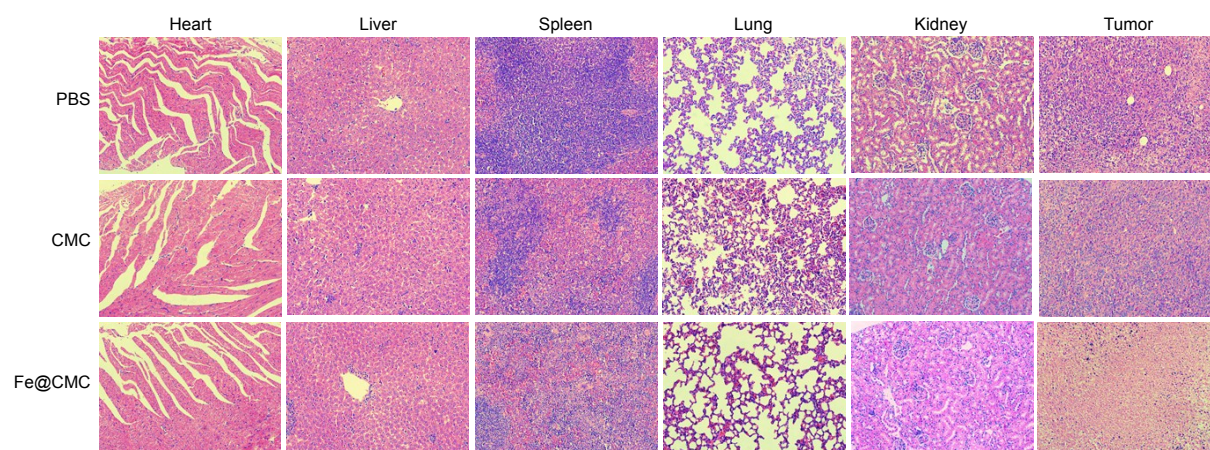

**Figure S10** Histological examination of main organs (heart, liver, spleen, lung and kidney) and tumors from mice treated with the PBS blank control, and the Fe@CMC group, respectively, by the H&E staining method.

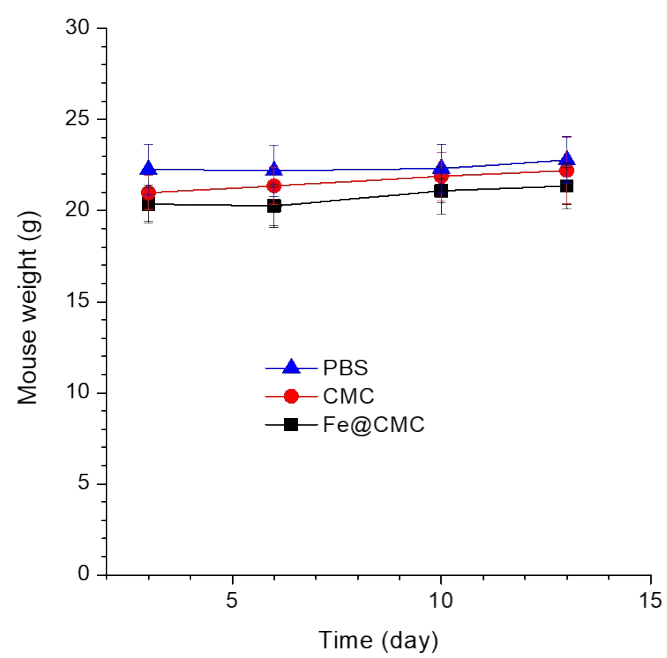

**Figure S11** The body weight change of 4T1 tumor-bearing mice during treatment.
